# Supplementary figures and images for: Two Distinct Superoxidase Dismutases (SOD) Secreted by the Helminth Parasite Fasciola hepatica Play Roles in Defence against Metabolic and Host Immune Cell-Derived Reactive Oxygen Species (ROS) during Growth and Development
Source: MDPI journal article supplement (doi:10.3390/antiox11101968), 2022-09-30

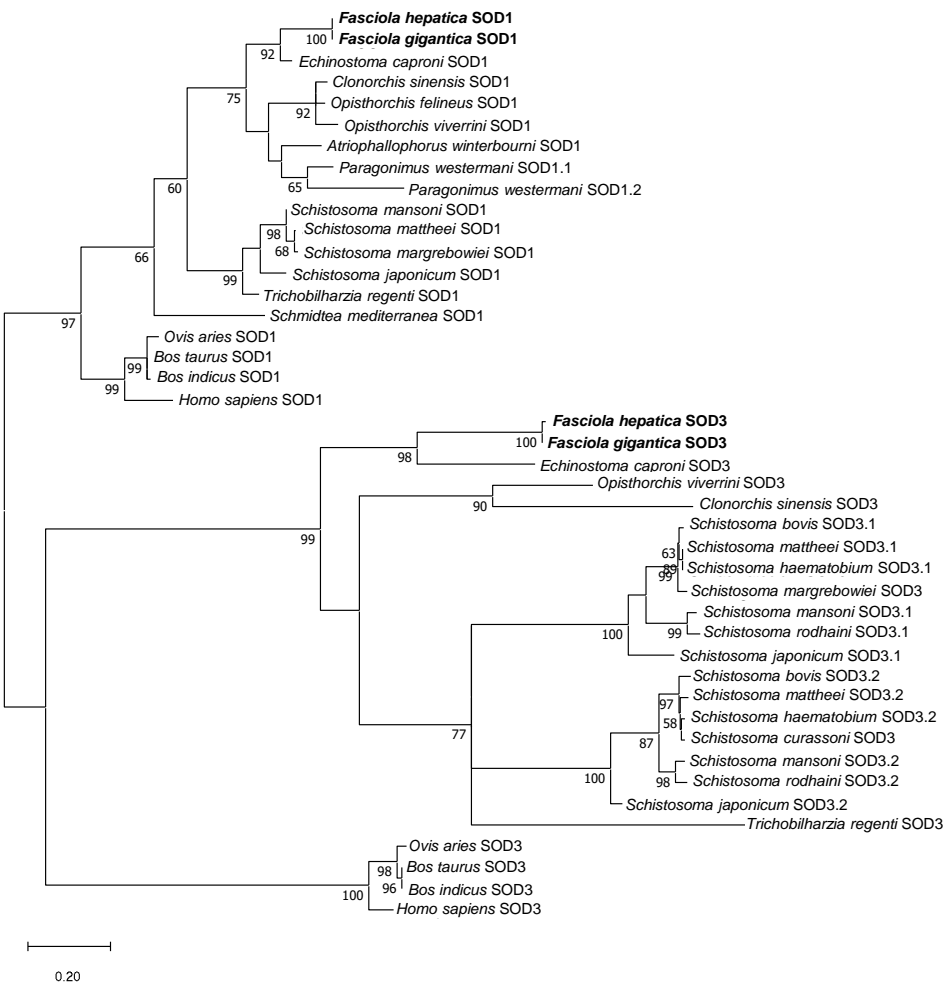

**Figure S2.**

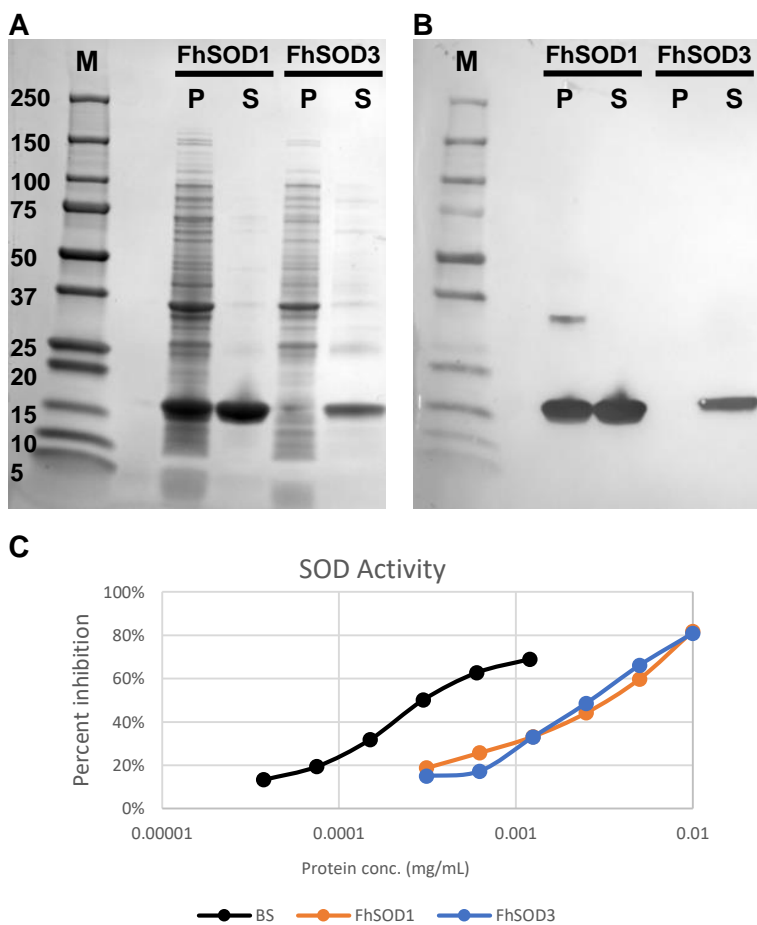

Figure S3.

**A**

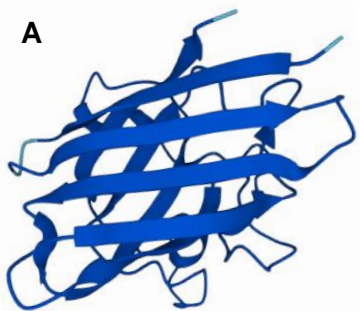

**B**

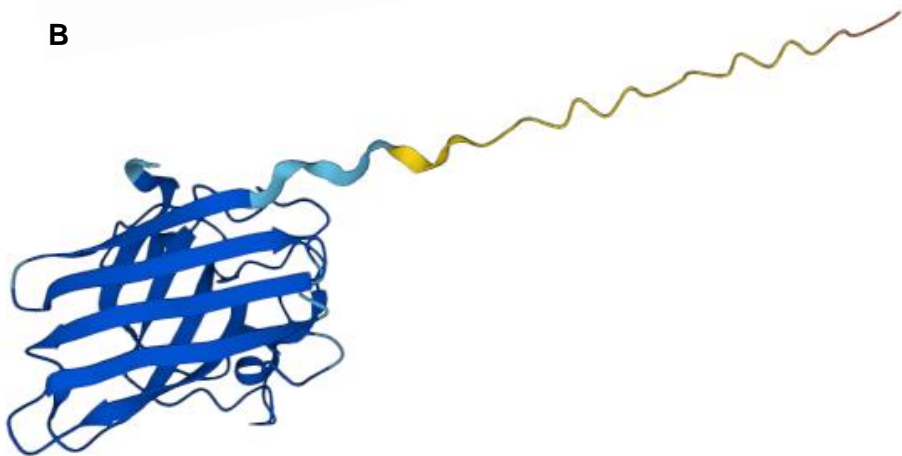

**Figure S4.**

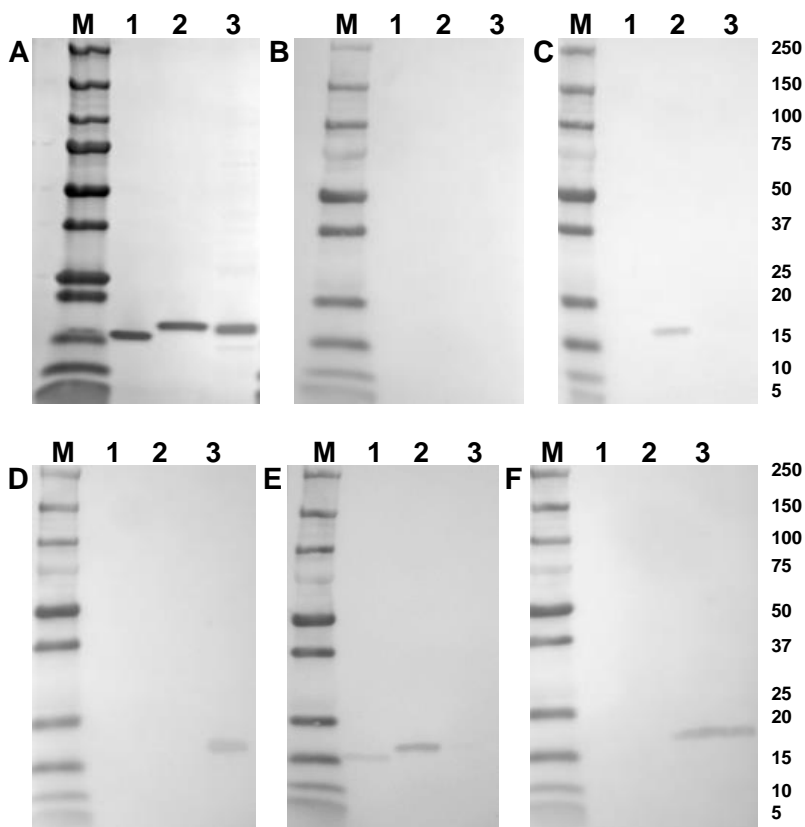

Figure S5.

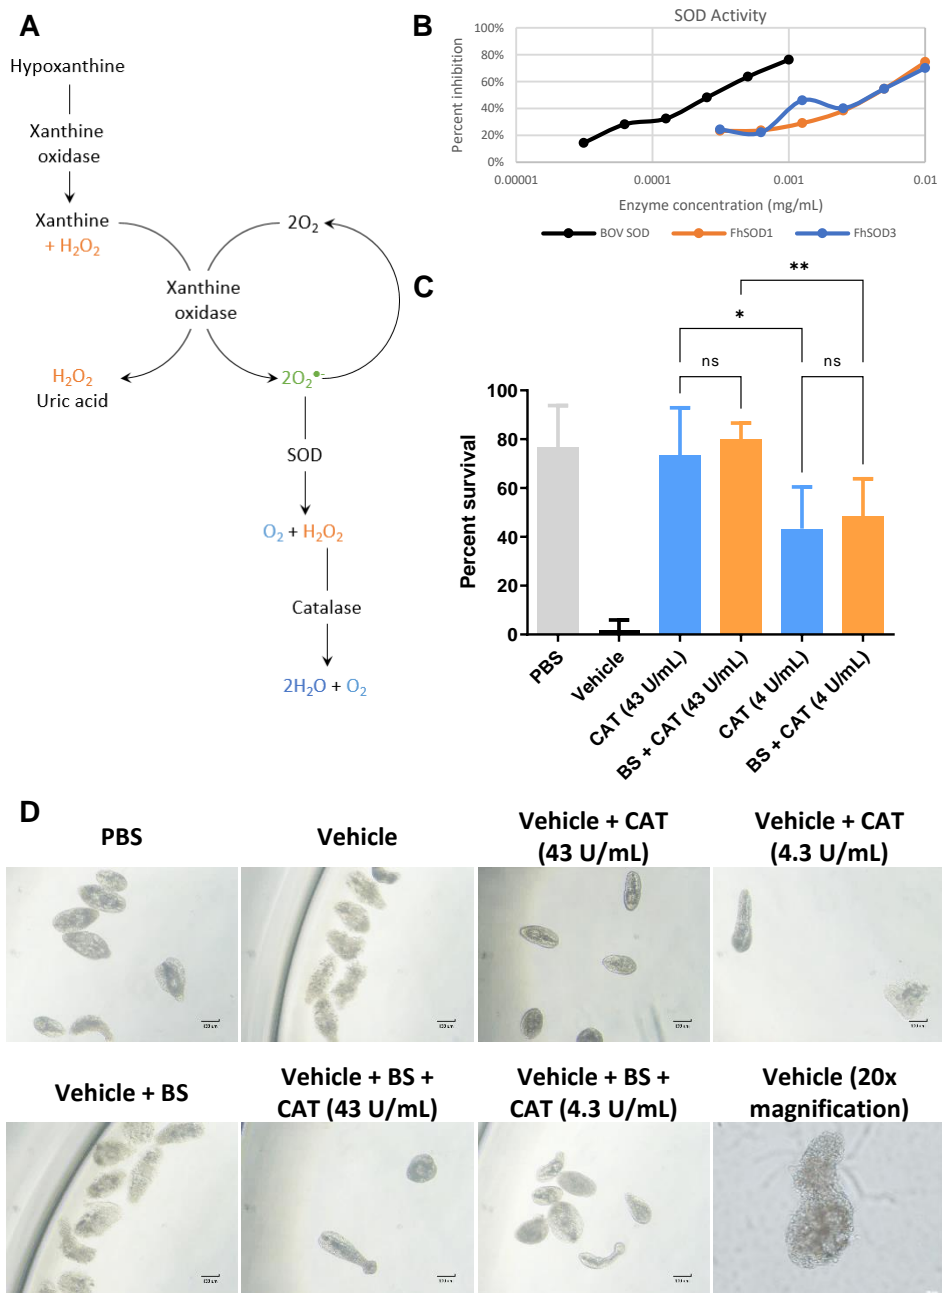

Figure S6.

Supplement: s1 [file s1]
